# Supplementary material for: The Effect of White Light Spectrum Modifications by Excess of Blue Light on the Frost Tolerance, Lipid- and Hormone Composition of Barley in the Early Pre-Hardening Phase
Source: MDPI journal article supplement (doi:10.3390/plants12010040), 2022-12-22
Supplement: s1 [file s1]

## Supplementary Materials

### The effect of white light spectrum modifications by excess of blue light on the frost tolerance, lipid- and hormone composition of barley in the early pre-hardening phase

Mohamed Ahres, Tamás Pálmai, Teréz Kovács, László Kovács, Jozef Lacek, Radomíra Vanková, Gábor Galiba, Péter Borbély

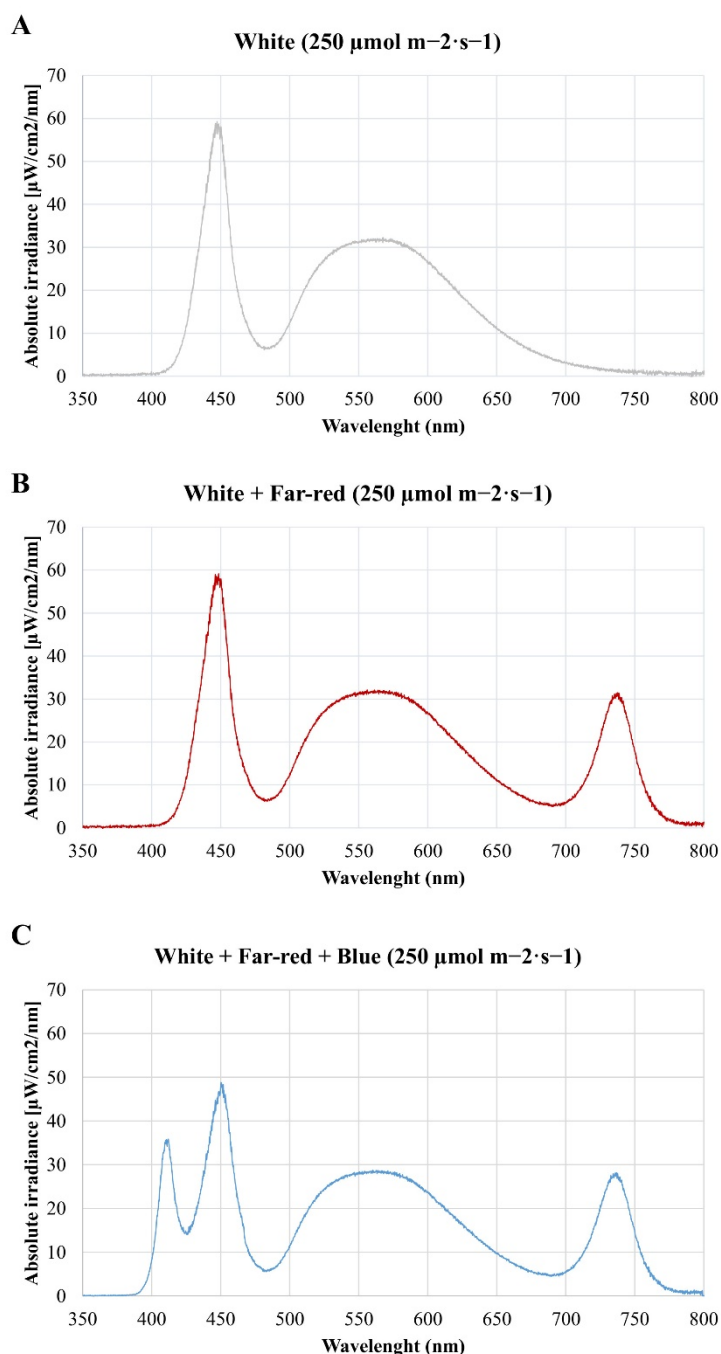

Figure S1: Spectral composition of modulated light treatments at  $250 \mu\text{mol m}^{-2}\text{s}^{-1}$  intensity. A) the spectral composition of the white light, B) the spectral composition of white light supplemented by far-red light, C) the spectral composition of white light supplemented with far-red and monochromatic blue (410nm) light.

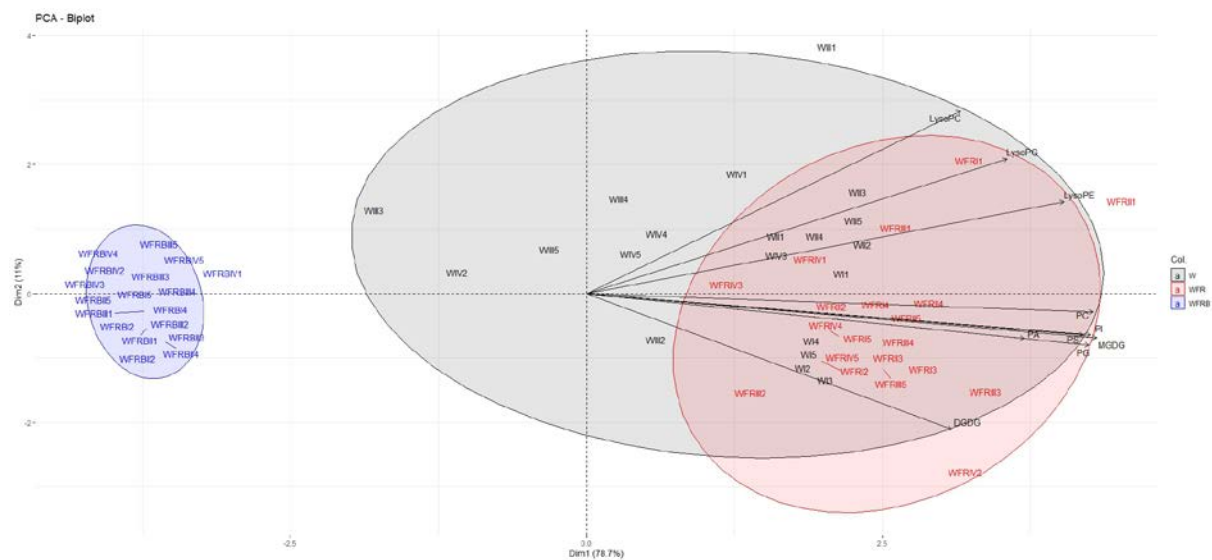

Figure S2: Principal component analysis on lipid classes under different light compositions. Grey circle: white light, Red circle: far-red-enriched white light, Blue circle: far-red and blue enriched white light. The statistical analyses were performed in R statistical computing environment using the following packages: “ggplot2”, “factoextra” and “agricolae”.
