# Supplementary material for: The Effect of White Light Spectrum Modifications by Excess of Blue Light on the Frost Tolerance, Lipid- and Hormone Composition of Barley in the Early Pre-Hardening Phase
Source: Plants (Basel). 2022 Dec 22;12(1):40. doi: 10.3390/plants12010040 (PMC9823678; doi:10.3390/plants12010040)
Supplement: Supplementary file 1 [file plants-12-00040-s001.zip › Table S1.xlsx]

## Sheet: Lipid species (Total %)
The effect of white light spectrum modifications by excess of blue light on the frost tolerance, lipid- and hormone composition of barley in the early pre-hardening phase
Mohamed Ahres, Tamás Pálmai, Teréz Kovács, László Kovács, Jozef Lacek, Radomíra Vanková, Gábor Galiba, Péter Borbély
Table S1: Different subspecies within DGDG, MGDG, PC and PE lipid family in barley leaves after far-red and far-red with blue supplementation at different temperatures. The signals were expressed as a percentage of the total lipid content detected (total lipid signal percentage (%)). The samples were illuminated with white light, white light supplemented with far-red light (WFR) or combined far-r…
					DGDG								MGDG								PC								PE
					Total signal %								Total signal %								Total signal %								Total signal %
					AVG	STD							AVG	STD							AVG	STD							AVG	STD
DGDG	15°C	1 Day	(34:4)	W	0.161741	0.0240513		MGDG	15°C	1 Day	(34:4)	W	0.0852697	0.010541		PC	15°C	1 Day	(34:4)	W	0.257513	0.0202653		PE	15°C	1 Day	(34:3)	W	34.6443	3.06386
				WFR	0.150725	0.0289406						WFR	0.0939431	0.00696905						WFR	0.237723	0.0329633						WFR	33.8123	3.12741
				WFRB	0.149575	0.0225247						WFRB	0.0913818	0.0112788						WFRB	0.283055	0.0190302						WFRB	28.3704	0.985275
			(34:3)	W	15.4605	0.464919					(34:3)	W	1.20185	0.0787663					(34:3)	W	21.8601	0.222931					(34:2)	W	21.7151	0.968077
				WFR	15.3733	0.46278						WFR	1.19973	0.0187485						WFR	21.3118	0.714767						WFR	21.5925	1.95493
				WFRB	13.7724	0.415922						WFRB	0.908428	0.0873451						WFRB	22.0504	0.452195						WFRB	20.3133	1.2577
			(34:2)	W	0.125789	0.0821966					(34:1)	W	0.0157929	0.00598408					(34:2)	W	21.6763	0.40728					(36:6)	W	12.4489	0.611206
				WFR	0.159739	0.023986						WFR	0.0268493	0.00672398						WFR	22.6056	1.63475						WFR	12.9018	1.25731
				WFRB	0.260965	0.0853093						WFRB	93.756	0.643843						WFRB	19.5628	0.736567						WFRB	10.1799	0.811215
			(34:1)	W	0.225735	0.0281985					(36:6)	W	94.0758	0.500422					(34:1)	W	2.01395	0.205396					(36:5)	W	20.8984	1.20645
				WFR	0.259909	0.0748544						WFR	93.4854	0.40121						WFR	1.86317	0.432751						WFR	20.8864	0.275149
				WFRB	0.200029	0.0593945						WFRB	3.39992	0.405379						WFRB	1.73486	0.302692						WFRB	20.1749	0.692953
			(36:6)	W	78.4257	0.48893					(36:5)	W	3.06209	0.261663					(36:6)	W	6.28004	0.134916					(36:4)	W	10.2933	1.54996
				WFR	78.2098	0.591199						WFR	3.53688	0.283913						WFR	5.78858	0.579195						WFR	10.807	2.21524
				WFRB	79.9384	0.33269						WFRB	1.36897	0.145627						WFRB	8.09287	0.485905						WFRB	11.6642	0.998648
			(36:5)	W	1.54059	0.170068					(36:4)	W	1.2001	0.134497					(36:5)	W	18.2328	0.288488				10 Day	(34:3)	W	29.4425	0.66223
				WFR	1.78053	0.249628						WFR	1.2897	0.0848095						WFR	18.0854	0.435165						WFR	32.8556	0.992774
				WFRB	2.14165	0.18738						WFRB	0.141203	0.0315619						WFRB	19.4627	0.621569						WFRB	27.4335	0.962489
			(36:4)	W	0.991415	0.224668					(38:6)	W	0.258545	0.00448714					(36:4)	W	19.6164	0.73655					(34:2)	W	27.1189	1.4357
				WFR	1.03676	0.125777						WFR	0.285513	0.00800979						WFR	20.2254	0.733145						WFR	23.587	2.59652
				WFRB	0.849037	0.0644292						WFRB	0.215699	0.00769596						WFRB	18.6494	0.170102						WFRB	21.987	0.975268
			(36:3)	W	1.70816	0.0976499					(38:5)	W	0.100573	0.0195472					(36:3)	W	4.94215	0.129186					(36:6)	W	8.44647	0.238112
				WFR	1.58308	0.0394603						WFR	0.0819811	0.00871929						WFR	4.97355	0.300754						WFR	10.5447	1.57277
				WFRB	1.61025	0.0650892						WFRB	0.0886336	0.00797553						WFRB	5.12522	0.721369						WFRB	9.0078	0.633142
			(36:2)	W	0.225769	0.0403279				10 Day	(34:4)	W	0.0897757	0.00994491					(36:2)	W	2.66499	0.0938406					(36:5)	W	20.3778	0.337904
				WFR	0.332594	0.163992						WFR	0.099089	0.00484518						WFR	2.59606	0.183826						WFR	21.2254	1.14946
				WFRB	1.02209	0.105904						WFRB	0.0826062	0.0148716						WFRB	2.34622	0.215411						WFRB	20.6438	0.758963
			(38:6)	W	1.13461	0.154459					(34:3)	W	1.12415	0.0635586					(38:6)	W	0.23823	0.0491475					(36:4)	W	14.6144	0.360105
				WFR	1.11355	0.0640484						WFR	1.01799	0.119002						WFR	0.197292	0.0552032						WFR	11.7873	1.11347
				WFRB	0.0556282	0.0124416						WFRB	0.828018	0.0652829						WFRB	0.218514	0.0217901						WFRB	13.0208	1.41062
		10 Day	(34:4)	W	0.148492	0.0145075					(34:1)	W	0.0278953	0.00414399					(38:5)	W	0.759955	0.102699			5°C	1 Day	(34:3)	W	30.0711	2.99482
				WFR	0.153867	0.0344205						WFR	0.0166576	0.00874421						WFR	0.64167	0.0113228						WFR	31.3908	0.929278
				WFRB	0.172361	0.0278126						WFRB	94.4158	1.00017						WFRB	0.663993	0.0515679						WFRB	21.4438	1.24925
			(34:3)	W	15.4219	0.321499					(36:6)	W	94.4125	1.28035					(38:4)	W	0.760387	0.0693583					(34:2)	W	25.2253	2.95632
				WFR	15.1033	0.743293						WFR	94.6671	0.857839						WFR	0.905607	0.105408						WFR	25.3047	1.58863
				WFRB	14.0606	0.905539						WFRB	3.04452	0.742071						WFRB	0.777722	0.0845346						WFRB	24.0388	1.20523
			(34:2)	W	0.596109	0.0882498					(36:5)	W	3.08292	0.897474					(38:3)	W	0.566444	0.132806					(36:6)	W	9.52785	1.92449
				WFR	0.459292	0.167966						WFR	3.18821	0.563065						WFR	0.457711	0.062539						WFR	9.77289	0.975904
				WFRB	0.19082	0.0955249						WFRB	1.23863	0.215025						WFRB	0.519924	0.108845						WFRB	7.72257	0.882255
			(34:1)	W	0.309766	0.0299781					(36:4)	W	0.953353	0.293467					(38:2)	W	0.13067	0.00711459					(36:5)	W	21.4366	0.175201
				WFR	0.355675	0.147981						WFR	0.756167	0.15221						WFR	0.110363	0.0724538						WFR	20.7601	0.479697
				WFRB	0.246907	0.0667255						WFRB	0.111111	0.029125						WFRB	0.192768	0.0525663						WFRB	21.6791	0.387589
			(36:6)	W	77.4517	0.208035					(38:6)	W	0.22343	0.0167306			15°C	10 Day	(34:4)	W	0.311137	0.0576814					(36:4)	W	13.7391	2.08544
				WFR	78.2775	1.98034						WFR	0.193121	0.0241229						WFR	0.367741	0.0687283						WFR	12.7715	0.693068
				WFRB	79.4881	0.965909						WFRB	0.210217	0.00670453						WFRB	0.287289	0.0454248						WFRB	17.3628	1.33892
			(36:5)	W	1.89525	0.233407					(38:5)	W	0.085939	0.00354908					(34:3)	W	27.4542	3.49225				7 Day	(34:3)	W	27.751	1.4071
				WFR	1.75812	0.434247						WFR	0.0616703	0.00840436						WFR	29.9662	3.92526						WFR	30.307	4.12739
				WFRB	2.15142	0.404945						WFRB	0.0565316	0.00832547						WFRB	21.05	1.5613						WFRB	21.9052	1.88765
			(36:4)	W	1.00268	0.203268			5°C	1 Day	(34:4)	W	0.108376	0.00133108					(34:2)	W	22.9089	1.25299					(34:2)	W	28.6766	0.601393
				WFR	1.03834	0.295417						WFR	0.10876	0.00614951						WFR	19.6578	2.96765						WFR	26.1119	5.2194
				WFRB	0.943567	0.177829						WFRB	0.090133	0.0105638						WFRB	20.7931	0.759838						WFRB	25.5409	2.4362
			(36:3)	W	1.87823	0.0559372					(34:3)	W	1.22611	0.0777323					(34:1)	W	1.05778	0.855293					(36:6)	W	8.00443	0.308565
				WFR	1.61008	0.2388						WFR	1.10334	0.056416						WFR	1.12379	0.373506						WFR	9.8334	3.23521
				WFRB	1.73269	0.0883773						WFRB	1.41749	0.301376						WFRB	1.58353	0.247446						WFRB	8.02146	1.47503
			(36:2)	W	0.392829	0.121073					(34:1)	W	0.0357459	0.00444934					(36:6)	W	8.91442	2.16432					(36:5)	W	20.5315	0.181278
				WFR	0.377252	0.0717901						WFR	0.0255736	0.00189485						WFR	11.3033	3.54007						WFR	20.3199	0.757928
				WFRB	0.957542	0.118644						WFRB	94.0383	0.597188						WFRB	7.45634	0.80749						WFRB	19.8204	0.406193
			(38:6)	W	0.903016	0.137579					(36:6)	W	94.9134	0.44945					(36:5)	W	17.782	0.36554					(36:4)	W	15.0365	0.780181
				WFR	0.866591	0.0498122						WFR	94.5293	0.363763						WFR	19.0919	0.37228						WFR	13.4278	2.6957
				WFRB	0.0560395	0.0358043						WFRB	2.85944	0.322354						WFRB	19.7116	0.408657						WFRB	16.9692	1.44047
	5°C	1 Day	(34:4)	W	0.170523	0.0114053					(36:5)	W	2.61829	0.372714					(36:4)	W	14.0812	2.90927
				WFR	0.158936	0.0127873						WFR	3.04942	0.338039						WFR	11.8366	2.67237
				WFRB	0.142194	0.0352337						WFRB	1.07383	0.132234						WFRB	19.8669	1.37037
			(34:3)	W	16.0921	0.969621					(36:4)	W	0.807942	0.12697					(36:3)	W	3.24129	0.584569
				WFR	15.4014	0.585324						WFR	0.929209	0.0804171						WFR	3.02157	0.729313
				WFRB	14.2	0.601603						WFRB	0.138379	0.0488886						WFRB	4.36502	0.5052
			(34:2)	W	0.824813	0.163306					(38:6)	W	0.202896	0.0214489					(36:2)	W	2.00356	0.45055
				WFR	0.50064	0.041392						WFR	0.201802	0.0068131						WFR	1.36451	0.394043
				WFRB	0.341761	0.105933						WFRB	0.215536	0.00522846						WFRB	2.28586	0.214073
			(34:1)	W	0.388059	0.0469642					(38:5)	W	0.0872577	0.0239998					(38:6)	W	0.297149	0.0589853
				WFR	0.399005	0.042628						WFR	0.0525837	0.00652129						WFR	0.315587	0.0485348
				WFRB	0.206321	0.0335393						WFRB	0.0972341	0.0223552						WFRB	0.21191	0.0448229
			(36:6)	W	76.0988	1.52753				7 Day	(34:4)	W	0.0831405	0.0173686					(38:5)	W	0.671892	0.00795412
				WFR	77.6049	0.604865						WFR	0.0980428	0.0151816						WFR	0.73292	0.0484069
				WFRB	79.4582	0.858798						WFRB	0.0657635	0.0154206						WFRB	0.690545	0.175035
			(36:5)	W	1.84224	0.228219					(34:3)	W	1.08987	0.0818845					(38:4)	W	0.715703	0.169012
				WFR	1.97118	0.127958						WFR	1.14936	0.121741						WFR	0.62515	0.177952
				WFRB	1.96749	0.343205						WFRB	1.35716	0.15423						WFRB	0.730486	0.190542
			(36:4)	W	1.1874	0.185834					(34:1)	W	0.0495802	0.0120183					(38:3)	W	0.402579	0.111855
				WFR	1.10822	0.0649972						WFR	0.0284763	0.00384744						WFR	0.435403	0.157574
				WFRB	0.935376	0.107525						WFRB	94.7597	0.336392						WFRB	0.4851	0.122172
			(36:3)	W	2.03609	0.0755773					(36:6)	W	95.2118	0.240963					(38:2)	W	0.158175	0.0205588
				WFR	1.59169	0.0659788						WFR	94.3539	0.0753422						WFR	0.157582	0.0607732
				WFRB	1.68106	0.0994723						WFRB	2.19561	0.235264						WFRB	0.197883	0.0502591
			(36:2)	W	0.460975	0.286659					(36:5)	W	2.34805	0.187459			5°C	1 Day	(34:4)	W	0.345007	0.0892029
				WFR	0.358643	0.129644						WFR	3.27477	0.155066						WFR	0.29327	0.0221373
				WFRB	1.01633	0.0902292						WFRB	1.0896	0.104523						WFRB	0.225559	0.0366294
			(38:6)	W	0.899007	0.109262					(36:4)	W	0.875669	0.0818383					(34:3)	W	28.7621	3.91399
				WFR	0.905458	0.119236						WFR	0.89839	0.139967						WFR	25.2736	3.03443
				WFRB	0.0513034	0.0244601						WFRB	0.17415	0.0334989						WFRB	18.7139	0.829275
		7 Day	(34:4)	W	0.164003	0.0150178					(38:6)	W	0.213421	0.0116632					(34:2)	W	20.1838	3.03426
				WFR	0.157666	0.0111855						WFR	0.144405	0.0204824						WFR	22.5984	1.61585
				WFRB	0.141539	0.0235682						WFRB	0.200645	0.0174465						WFRB	22.0993	0.358037
			(34:3)	W	15.4498	0.312476					(38:5)	W	0.128461	0.011332					(34:1)	W	0.698647	0.116954
				WFR	14.2077	1.51955						WFR	0.0526346	0.00769866						WFR	1.40074	0.420786
				WFRB	13.6099	0.259713						WFRB	0.0854895	0.0107964						WFRB	1.38348	0.15781
			(34:2)	W	0.68429	0.101288													(36:6)	W	11.2699	3.64739
				WFR	0.721531	0.0778243														WFR	8.09566	1.71013
				WFRB	0.641701	0.0947815														WFRB	6.58983	0.480412
			(34:1)	W	0.346646	0.0259854													(36:5)	W	18.5111	0.642071
				WFR	0.305158	0.0640652														WFR	18.6137	0.106212
				WFRB	0.188607	0.0190349														WFRB	20.245	0.392931
			(36:6)	W	77.4287	0.641219													(36:4)	W	12.8564	2.88946
				WFR	78.8691	2.24241														WFR	15.7882	2.41358
				WFRB	79.7462	0.104567														WFRB	21.4633	0.988572
			(36:5)	W	1.89585	0.164169													(36:3)	W	3.48379	0.501772
				WFR	2.05656	0.113054														WFR	3.66912	0.257189
				WFRB	1.81736	0.16996														WFRB	4.31796	0.179504
			(36:4)	W	1.04621	0.0948745													(36:2)	W	2.00535	0.446506
				WFR	0.977829	0.164257														WFR	2.03024	0.251121
				WFRB	1.03587	0.0800845														WFRB	2.31632	0.151702
			(36:3)	W	1.89451	0.0873026													(38:6)	W	0.297177	0.058774
				WFR	1.62389	0.269834														WFR	0.209307	0.0115056
				WFRB	1.81733	0.0859114														WFRB	0.189609	0.0277989
			(36:2)	W	0.186799	0.0163584													(38:5)	W	0.601933	0.0118745
				WFR	0.28577	0.0857743														WFR	0.714441	0.0183913
				WFRB	0.934418	0.0519905														WFRB	0.68345	0.0538585
			(38:6)	W	0.903189	0.0451791													(38:4)	W	0.539923	0.115034
				WFR	0.794781	0.0552575														WFR	0.683049	0.0321582
				WFRB	0.0670409	0.0141033														WFRB	0.77329	0.0631675
																			(38:3)	W	0.3463	0.0544843
																				WFR	0.435323	0.00751049
																				WFRB	0.526447	0.0596742
																			(38:2)	W	0.0986019	0.0285134
																				WFR	0.194873	0.0602821
																				WFRB	0.225041	0.0305017
																	5°C	7 Day	(34:4)	W	0.287567	0.0484807
																				WFR	0.300785	0.0364367
																				WFRB	0.221762	0.032617
																			(34:3)	W	25.6322	1.01526
																				WFR	27.6696	3.57557
																				WFRB	17.8513	0.756645
																			(34:2)	W	22.3725	0.760108
																				WFR	20.2786	4.34658
																				WFRB	20.217	1.15974
																			(34:1)	W	0.777502	0.107386
																				WFR	0.7591	0.146035
																				WFRB	0.890909	0.0801211
																			(36:6)	W	7.996	0.358764
																				WFR	11.969	5.29758
																				WFRB	8.54662	1.0995
																			(36:5)	W	18.8799	0.387534
																				WFR	19.739	0.684119
																				WFRB	21.9107	0.438008
																			(36:4)	W	15.957	1.00486
																				WFR	12.9445	3.68476
																				WFRB	21.3678	1.23268
																			(36:3)	W	3.35274	0.152775
																				WFR	2.46116	0.373898
																				WFRB	3.85899	0.320392
																			(36:2)	W	2.15587	0.113742
																				WFR	1.36413	0.462863
																				WFRB	1.96966	0.147439
																			(38:6)	W	0.349197	0.0939195
																				WFR	0.347444	0.0600964
																				WFRB	0.216911	0.0283708
																			(38:5)	W	0.773447	0.0642351
																				WFR	0.717375	0.109708
																				WFRB	0.811578	0.0554645
																			(38:4)	W	0.794029	0.0488457
																				WFR	0.74924	0.15855
																				WFRB	0.983865	0.0975198
																			(38:3)	W	0.478848	0.0438989
																				WFR	0.517125	0.0818176
																				WFRB	0.674023	0.0844281
																			(38:2)	W	0.193146	0.0277459
																				WFR	0.182917	0.0574439
																				WFRB	0.222245	0.0384595
